# Supplementary material for: Cohort profile : Bandim Health Project’s (BHP) rural Health and Demographic Surveillance System (HDSS)—a nationally representative HDSS in Guinea-Bissau
Source: PubMed Central journal article supplement — BMJ Open. 2019 Jun 11;9(6):e028775. doi: 10.1136/bmjopen-2018-028775 (PMC6575866; doi:10.1136/bmjopen-2018-028775), 2019-06-11
Supplement: bmjopen-2018-028775supp001.pdf [file bmjopen-2018-028775supp001.pdf]

## Appendix: List of papers based on data from the Bandim Health Project rural HDSS

1. Aaby P, Bukh J, Lisse IM, et al. Spacing, crowding, and child mortality in Guinea-Bissau. *Lancet* 1983;2(8342):161.
2. Aaby P, Bukh J, Smits AJ, et al. High case fatality rate in twins with measles. *Lancet* 1983;2(8351):690.
3. Aaby P, Bukh J, Lisse IM, et al. Determinants of measles mortality in a rural area of Guinea-Bissau: crowding, age, and malnutrition. *Journal of tropical pediatrics* 1984;30(3):164-8. doi: 10.1093/tropej/30.3.164
4. Gomes J, Fernandes MA, Indi F, et al. [Malnutrition and infant mortality in the regions of Tombali, Cacheu, Oio, Biombo, and Gabu]. *Boletim de informacao socio-economica / Gabinete de Estudos Economicos, Ministerio do Plano e Cooperacao Internacional* 1989;5:11-44.
5. Aaby P, Molbak K. Siblings of opposite sex as a risk factor for child mortality. *BMJ* 1990;301(6744):143-5.
6. Aaby P, Andersen M, Sodemann M, et al. Reduced childhood mortality after standard measles vaccination at 4-8 months compared with 9-11 months of age. *BMJ* 1993;307(6915):1308-11.
7. Aaby P, Samb B, Simondon F, et al. Non-specific beneficial effect of measles immunisation: analysis of mortality studies from developing countries. *BMJ* 1995;311(7003):481-5.
8. Aaby P, Martins C, Bale C, et al. Assessing measles vaccination coverage by maternal recall in Guinea-Bissau. *Lancet* 1998;352(9135):1229.
9. Hoj L, Stensballe J, Aaby P. Maternal mortality in Guinea-Bissau: the use of verbal autopsy in a multi-ethnic population. *Int J Epidemiol* 1999;28(1):70-76.
10. Aaby P, Gomes J, Fernandes M, et al. Nutritional status and mortality of refugee and resident children in a non-camp setting during conflict: follow up study in Guinea-Bissau. *BMJ* 1999;319(7214):878-81.
11. Kristensen I, Aaby P, Jensen H. Routine vaccinations and child survival: follow up study in Guinea-Bissau, West Africa. *BMJ* 2000;321(7274):1435-8.
12. Hoj L, da Silva D, Hedegaard K, et al. Factors associated with maternal mortality in rural Guinea-Bissau. A longitudinal population-based study. *BJOG : an international journal of obstetrics and gynaecology* 2002;109(7):792-9.
13. Aaby P, Jensen H. Routine vaccinations and child survival: effect of gender. *BMJ* 2002
14. Hoj L, da Silva D, Hedegaard K, et al. Maternal mortality: only 42 days? *BJOG : an international journal of obstetrics and gynaecology* 2003;110(11):995-1000.
15. Aaby P, Jensen H, Rodrigues A, et al. Divergent female-male mortality ratios associated with different routine vaccinations among female-male twin pairs. *Int J Epidemiol* 2004;33(2):367-73. doi: 10.1093/ije/dyh004

16. Aaby P, Jensen H, Gomes J, et al. The introduction of diphtheria-tetanus-pertussis vaccine and child mortality in rural Guinea-Bissau: an observational study. *Int J Epidemiol* 2004;33(2):374-80. doi: 10.1093/ije/dyh005
17. Masmas TN, Jensen H, Silva D, et al. Survival among motherless children in rural and urban areas in Guinea-Bissau. *Acta Paediatrica* 2007;93(1):99-105. doi: 10.1111/j.1651-2227.2004.tb00682.x
18. Masmas TN, Jensen H, da Silva D, et al. The social situation of motherless children in rural and urban areas of Guinea-Bissau. *Soc Sci Med* 2004;59(6):1231-9. doi: 10.1016/j.socscimed.2003.12.012
19. Jensen H, Benn CS, Lisse IM, et al. Survival bias in observational studies of the impact of routine immunizations on childhood survival. *Trop Med Int Health* 2007;12(1):5-14. doi: 10.1111/j.1365-3156.2006.01773.x
20. Aaby P, Benn CS, Nielsen J, et al. DTP vaccination and child survival in observational studies with incomplete vaccination data. *Trop Med Int Health* 2007;12(1):15-24. doi: 10.1111/j.1365-3156.2006.01774.x
21. Aaby P, Benn C, Nielsen J, et al. Testing the hypothesis that diphtheria-tetanus-pertussis vaccine has negative non-specific and sex-differential effects on child survival in high-mortality countries. *BMJ open* 2012;2(3):e000707. doi: 10.1136/bmjopen-2011-000707
22. Hornshoj L, Benn CS, Fernandes M, et al. Vaccination coverage and out-of-sequence vaccinations in rural Guinea-Bissau: an observational cohort study. *BMJ open* 2012;2(6):e001509-e09. doi: 10.1136/bmjopen-2012-001509
23. Danneskiold-Samsøe N, Fisker AB, Jørgensen MJ, et al. Determinants of vitamin A deficiency in children between 6 months and 2 years of age in Guinea-Bissau. *BMC Public Health* 2013;13(1):172. doi: 10.1186/1471-2458-13-172
24. Mane M, Fisker AB, Ravn H, et al. Trends and determinants of mortality in women of reproductive age in rural Guinea-Bissau, West Africa - a cohort study. *BMC women's health* 2013;13:48. doi: 10.1186/1472-6874-13-48
25. Fisker AB, Ravn H, Rodrigues A, et al. Co-administration of live measles and yellow fever vaccines and inactivated pentavalent vaccines is associated with increased mortality compared with measles and yellow fever vaccines only. An observational study from Guinea-Bissau. *Vaccine* 2014;32(5):598-605. doi: 10.1016/j.vaccine.2013.11.074
26. Fisker AB, Bale C, Rodrigues A, et al. High-dose Vitamin A With Vaccination After 6 Months of Age: A Randomized Trial. *Pediatrics* 2014;134(3):e739-48. doi: 10.1542/peds.2014-0550
27. Fisker AB, Hornshoj L, Rodrigues A, et al. Effects of the introduction of new vaccines in Guinea-Bissau on vaccine coverage, vaccine timeliness, and child survival: an observational study. *The lancet global health* 2014;2(8):e478-87. doi: 10.1016/S2214-109X(14)70274-8
28. Thyssen SM, Byberg S, Pedersen M, et al. BCG coverage and barriers to BCG vaccination in Guinea-Bissau: an observational study. *BMC Public Health* 2014;14(1):1037. doi: 10.1186/1471-2458-14-1037

29. Aaby P, Martins CL, Ravn H, et al. Is early measles vaccination better than later measles vaccination? *Transactions of the Royal Society of Tropical Medicine and Hygiene* 2015;109(1):16-28. doi: 10.1093/trstmh/tru174
30. Storgaard L, Rodrigues A, Martins C, et al. Development of BCG Scar and Subsequent Morbidity and Mortality in Rural Guinea-Bissau. *Clinical infectious diseases : an official publication of the Infectious Diseases Society of America* 2015;61(6):950-9. doi: 10.1093/cid/civ452
31. Fisker AB, Rodrigues A, Martins C, et al. Reduced All-Cause Child Mortality After General Measles Vaccination Campaign in Rural Guinea-Bissau. *Pediatr Infect Dis J* 2015;34(12):1369-76. doi: 10.1097/INF.0000000000000896
32. Byberg S, Fisker AB, Rodrigues A, et al. Household experience and costs of seeking measles vaccination in rural Guinea-Bissau. *Trop Med Int Health* 2017;22(1):12-20. doi: 10.1111/tmi.12793
33. Byberg S, Fisker AB, Thyssen SM, et al. Cost-effectiveness of providing measles vaccination to all children in Guinea-Bissau. *Global health action* 2017;10(1):1329968. doi: 10.1080/16549716.2017.1329968
34. Nielsen BU, Byberg S, Aaby P, et al. Seasonal variation in child mortality in rural Guinea-Bissau. *Trop Med Int Health* 2017;22(7):846-56. doi: 10.1111/tmi.12889
35. Byberg S, Ostergaard MD, Rodrigues A, et al. Analysis of risk factors for infant mortality in the 1992-3 and 2002-3 birth cohorts in rural Guinea-Bissau. *PloS one* 2017;12(5):e0177984. doi: 10.1371/journal.pone.0177984
36. Fisker AB, Nebie E, Schoeps A, et al. A Two-Center Randomized Trial of an Additional Early Dose of Measles Vaccine: Effects on Mortality and Measles Antibody Levels. *Clinical infectious diseases : an official publication of the Infectious Diseases Society of America* 2018;66(10):1573-80. doi: 10.1093/cid/cix1033
37. Funch KM, Thyssen SM, Rodrigues A, et al. Determinants of BCG scarification among children in rural Guinea-Bissau: A prospective cohort study. *Human vaccines & immunotherapeutics* 2018:1-9. doi: 10.1080/21645515.2017.1421879
38. Hansen JS, Thyssen SM, Rodrigues A, et al. Is early measles vaccination associated with stronger survival benefits than later measles vaccination? *BMC Public Health* 2018;18(1):984. doi: 10.1186/s12889-018-5866-y
39. Fisker AB, Thyssen SM. Non-live pentavalent vaccines after live measles vaccine may increase mortality. *Vaccine* 2018;36(41):6039-42. doi: 10.1016/j.vaccine.2018.08.083
